# Supplementary material for: A fungal effector targets a heat shock–dynamin protein complex to modulate mitochondrial dynamics and reduce plant immunity
Source: PubMed Central journal article supplement — Sci Adv. 2020 Nov 25;6(48):eabb7719. doi: 10.1126/sciadv.abb7719 (PMC7688324; doi:10.1126/sciadv.abb7719), 2020-11-25
Supplement: abb7719_SM.pdf [file abb7719_SM.pdf]

## Supplementary Materials for

### **A fungal effector targets a heat shock–dynamin protein complex to modulate mitochondrial dynamics and reduce plant immunity**

Guojuan Xu, Xionghui Zhong, Yanlong Shi, Zhuo Liu, Nan Jiang, Jing Liu, Bo Ding, Zhiqiang Li, Houxiang Kang, Yuese Ning, Wende Liu, Zejian Guo, Guo-Liang Wang\*, Xuli Wang\*

\*Corresponding author. Email: [wang.620@osu.edu](mailto:wang.620@osu.edu) (G.-L.W.); [wangxuli@caas.cn](mailto:wangxuli@caas.cn) (X.W.)

Published 25 November 2020, *Sci. Adv.* **6**, eabb7719 (2020)

DOI: [10.1126/sciadv.abb7719](https://doi.org/10.1126/sciadv.abb7719)

#### **This PDF file includes:**

Figs. S1 to S8

Table S1

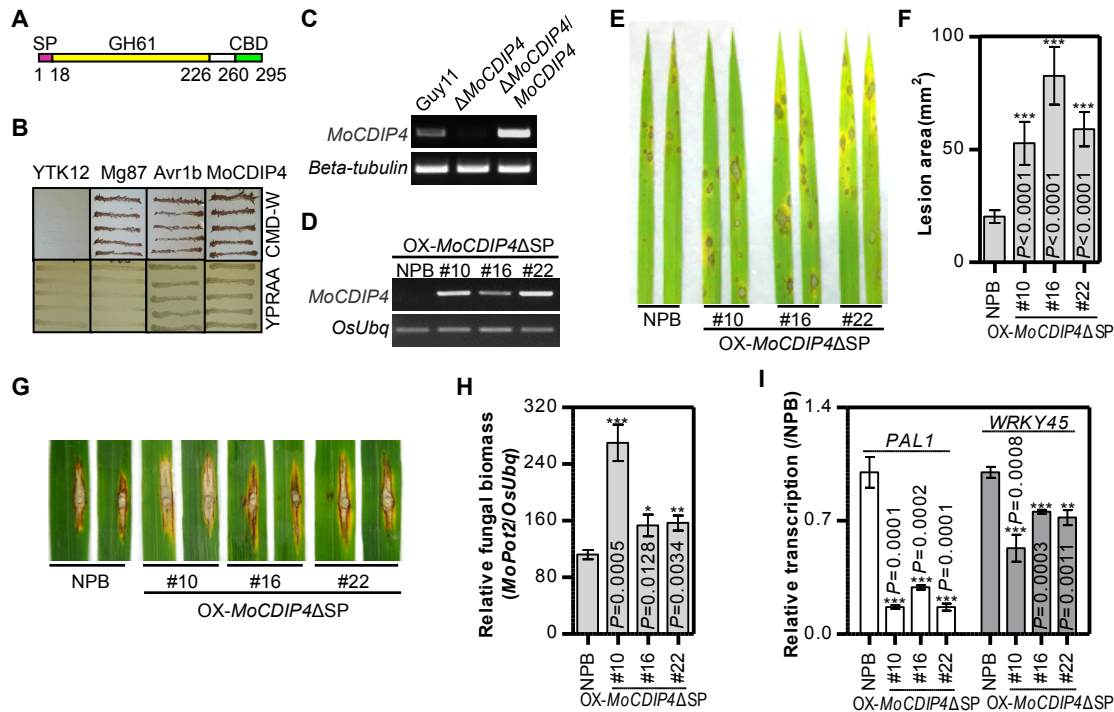

**Fig. S1. MoCDIP4 is a virulent effector of *M. oryzae*.** (A) The structure of MoCDIP4. (B) Secretory ability of the MoCDIP4 signal peptide. Avr1b and Mg87 were used as a positive and a negative control, respectively. (C) *MoCDIP4* transcript levels in the *MoCDIP4* mutant. Guy11 was the wild-type strain, Beta-tubulin was used as the loading control. (D) *MoCDIP4* transcript levels in *MoCDIP4* transgenic rice. Rice ubiquitin gene *OsUbq* was used as the loading control. (E) Spray inoculation of *MoCDIP4* overexpression plants with *M. oryzae*. (F) Lesion area of spray-inoculated leaves in (E). Bars represent means  $\pm$  SD, n = 5. Asterisks indicate significant differences between the transgenic line and NPB according to a Student's *t*-test. (G) Punch inoculation of *MoCDIP4* overexpression plants with *M. oryzae*. (H) Relative fungal biomass of punch-inoculated leaves in (G). (I) Transcript levels of PR genes in *MoCDIP4* transgenic rice at 2 days after inoculation. Bars (H, I) represent means  $\pm$  SD, n = 3. Asterisks (H, I) indicate significant differences between the transgenic line and NPB according to a Student's *t*-test.

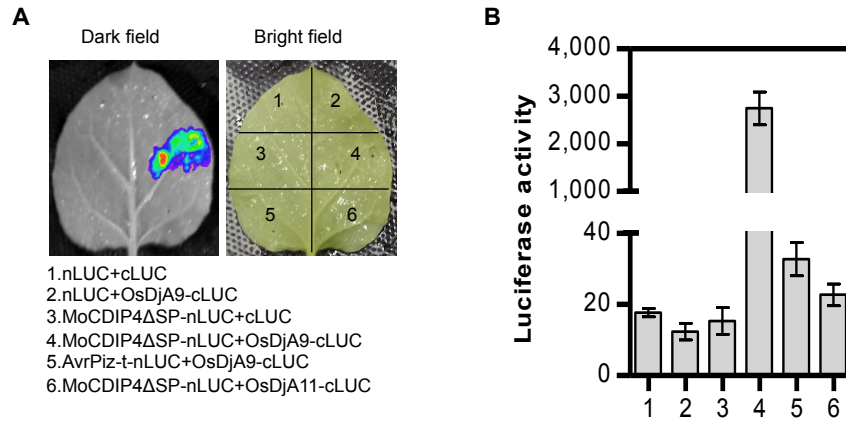

**Fig. S2. MoCDIP4 interacts with OsDjA9 in LCI assay.** (A) Fluorescent image of the MoCDIP4-OsDjA9 interaction in LCI assay. AvrPiz-t and OsDjA11 were used as the specific control. (B) Quantification of luciferase activity in the leaves shown in (A). Bars represent means  $\pm$  SD, n = 3.

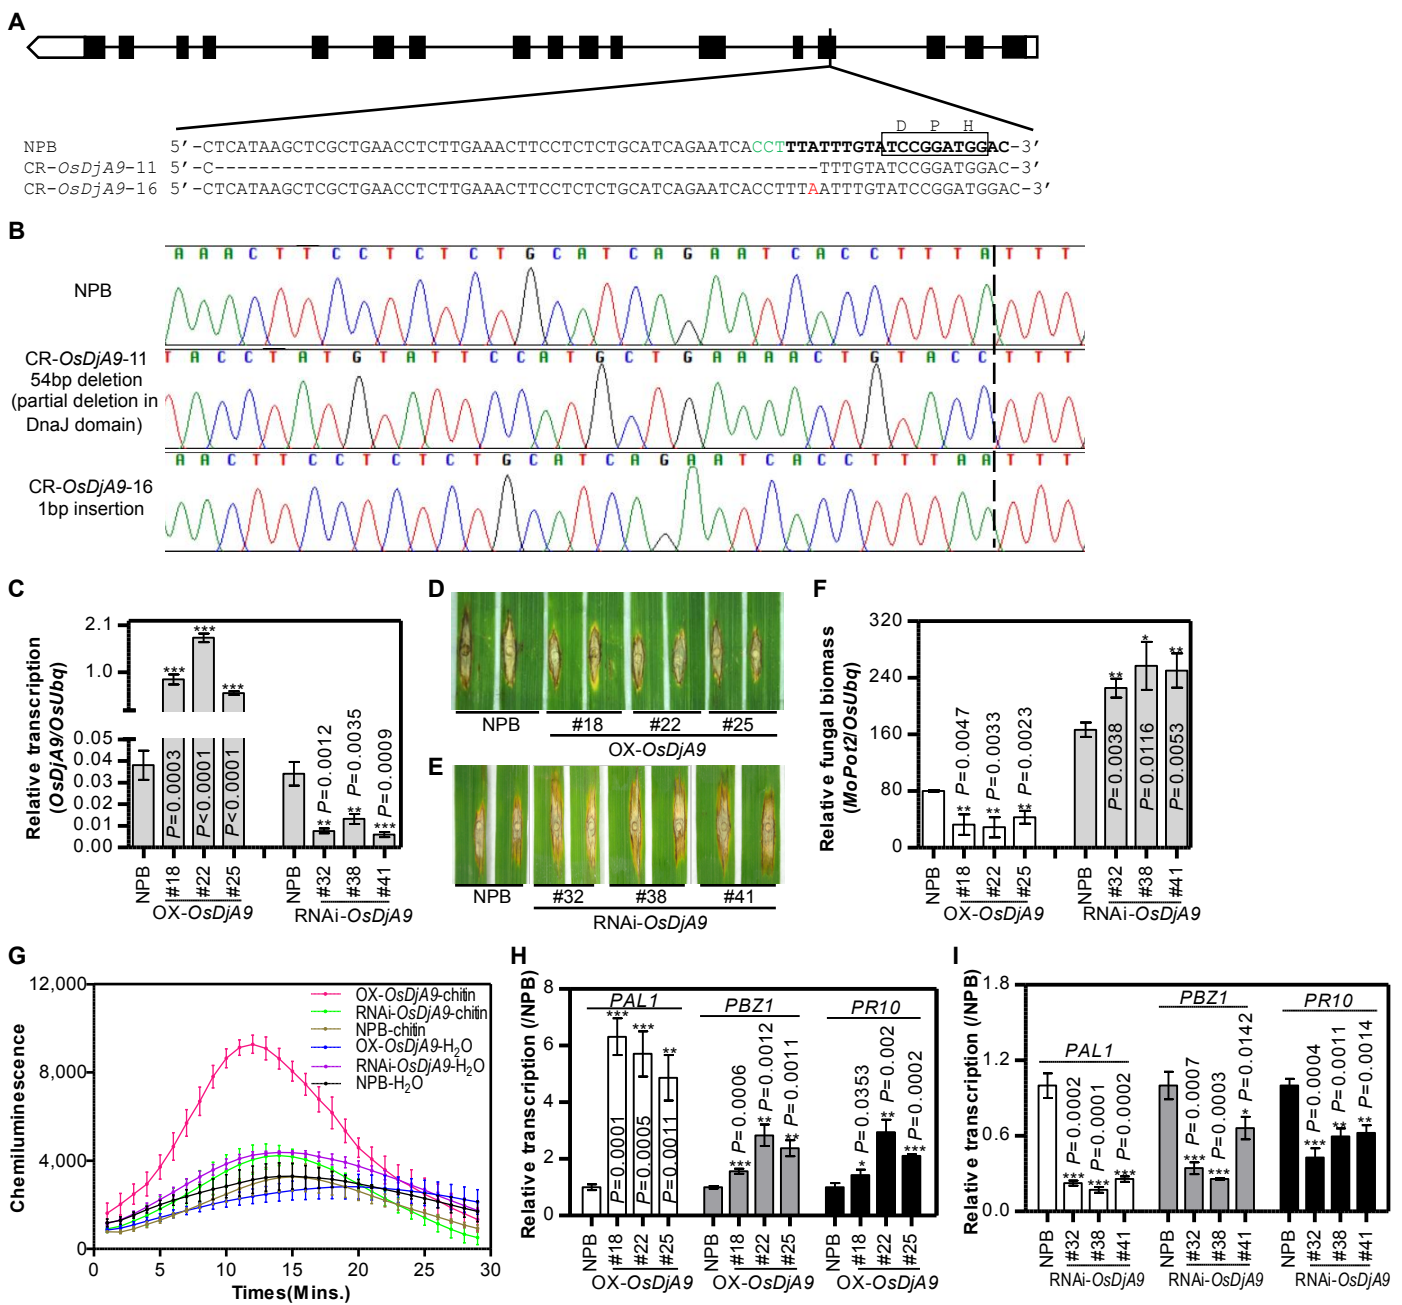

**Fig. S3. *OsDjA9* positively regulates rice immunity against *M. oryzae*.** (A) Schematic representation of the *OsDjA9* structure and gene editing sites. Bold letters indicate the target sequences of single guide RNA, green letters indicate PAM, - indicates nucleotide deletion, and red letter indicates nucleotide insertion. (B) Sanger sequencing chromatograph of the target site in *OsDjA9*. (C) *OsDjA9* transcript levels in *OsDjA9* transgenic plants. Punch inoculation of *OsDjA9* (D) overexpression and (E) RNAi plants with *M. oryzae*. (F) Relative fungal biomass of punch-inoculated leaves in (D, E). (G) ROS accumulation in *OsDjA9* transgenic plants after chitin treatment. Transcript levels of PR genes in *OsDjA9* (H) overexpression and (I) RNAi plants at 2 days after inoculation. Bars (C, F-I) represent means  $\pm$  SD, n = 3. Asterisks (C, F, H, I) indicate the significant differences between the transgenic line and NPB according to Student's *t*-test.



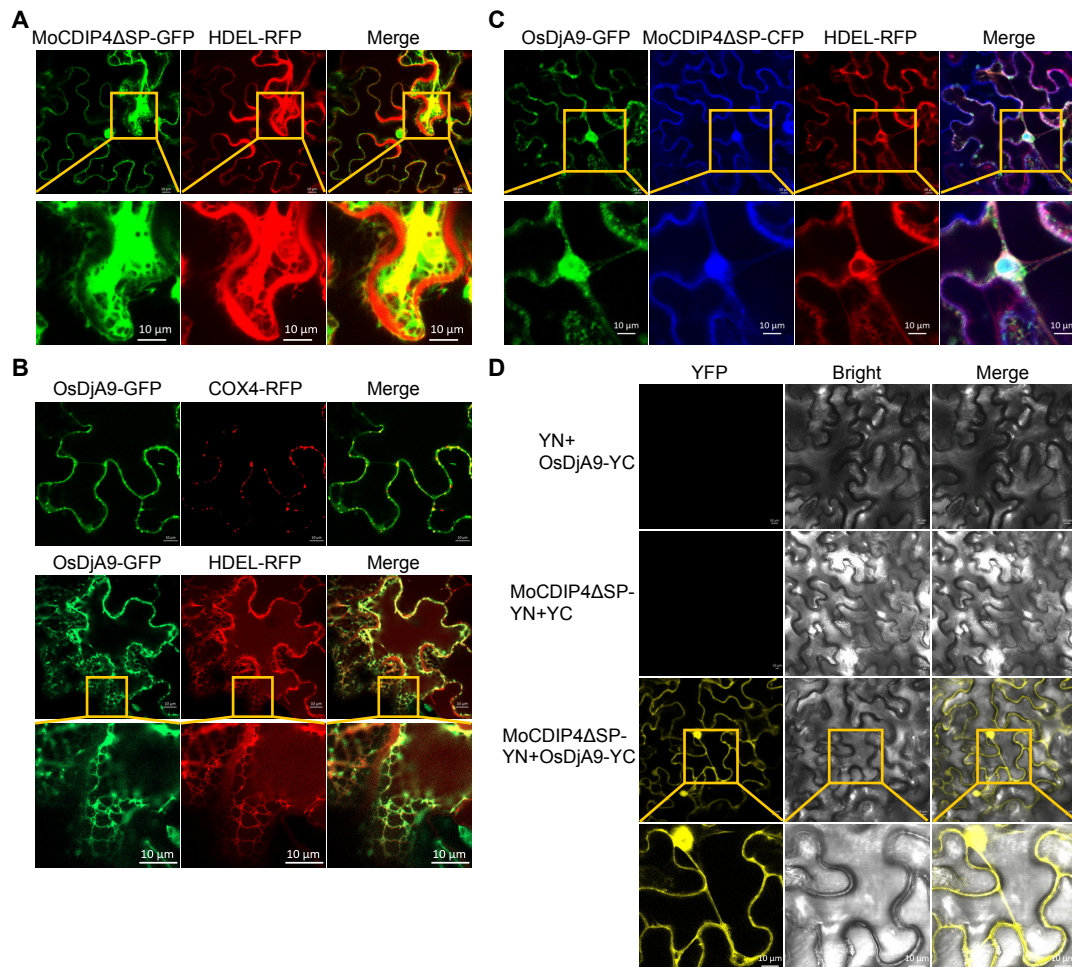

**Fig. S4. MoCDIP4 and OsDjA9 are co-localized in the ER in *N. benthamiana*.** (A) Subcellular localization of MoCDIP4 in *N. benthamiana*. HDEL was used as the ER marker. (B) Subcellular localization of OsDjA9 in *N. benthamiana*. COX4 was used as the mitochondrial marker; HDEL was used as the ER marker. (C) Co-localization of MoCDIP4 and OsDjA9 in *N. benthamiana*. HDEL was used as the ER marker. (D) BiFC analysis of the MoCDIP4-OsDjA9 interaction in *N. benthamiana*. Yellow squares (A-D) show the enlarged ER localization. Scale bars (A-D) represent 10  $\mu$ m.

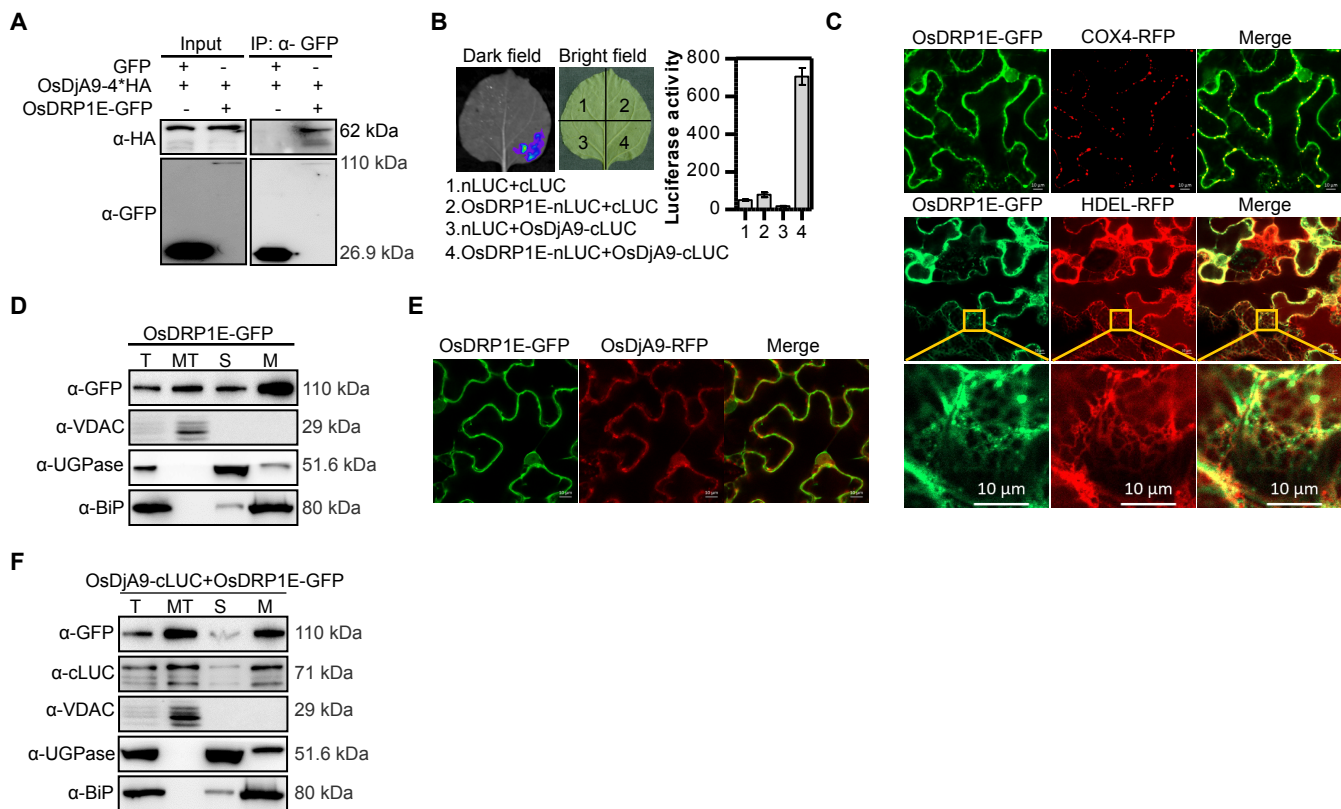

**Fig. S5. OsDjA9 interacts with the dynamin-related protein OsDRP1E.** (A) Interaction between OsDjA9 and OsDRP1E in Co-IP assay. 4\*HA was a fusion of four HA tags. (B) Interaction between OsDjA9 and OsDRP1E in LCI assay. Bars represent means  $\pm$  SD,  $n = 3$ . (C) Subcellular localization of OsDRP1E in *N. benthamiana*. COX4 was used as mitochondrial marker; HDEL was used as the ER marker. Yellow squares show the enlarged ER localization. (D) Detection of OsDRP1E in different cell fractions extracted from (C). T, total extract; MT, mitochondria; S, soluble fraction; M, membrane fraction. (E) Co-localization of OsDjA9 and OsDRP1E in *N. benthamiana*. (F) Detection of OsDjA9 and OsDRP1E in different cell fractions extracted from tobacco leaves co-infiltrated with OsDjA9 and OsDRP1E. Scale bars (C, E) represent 10  $\mu$ m.

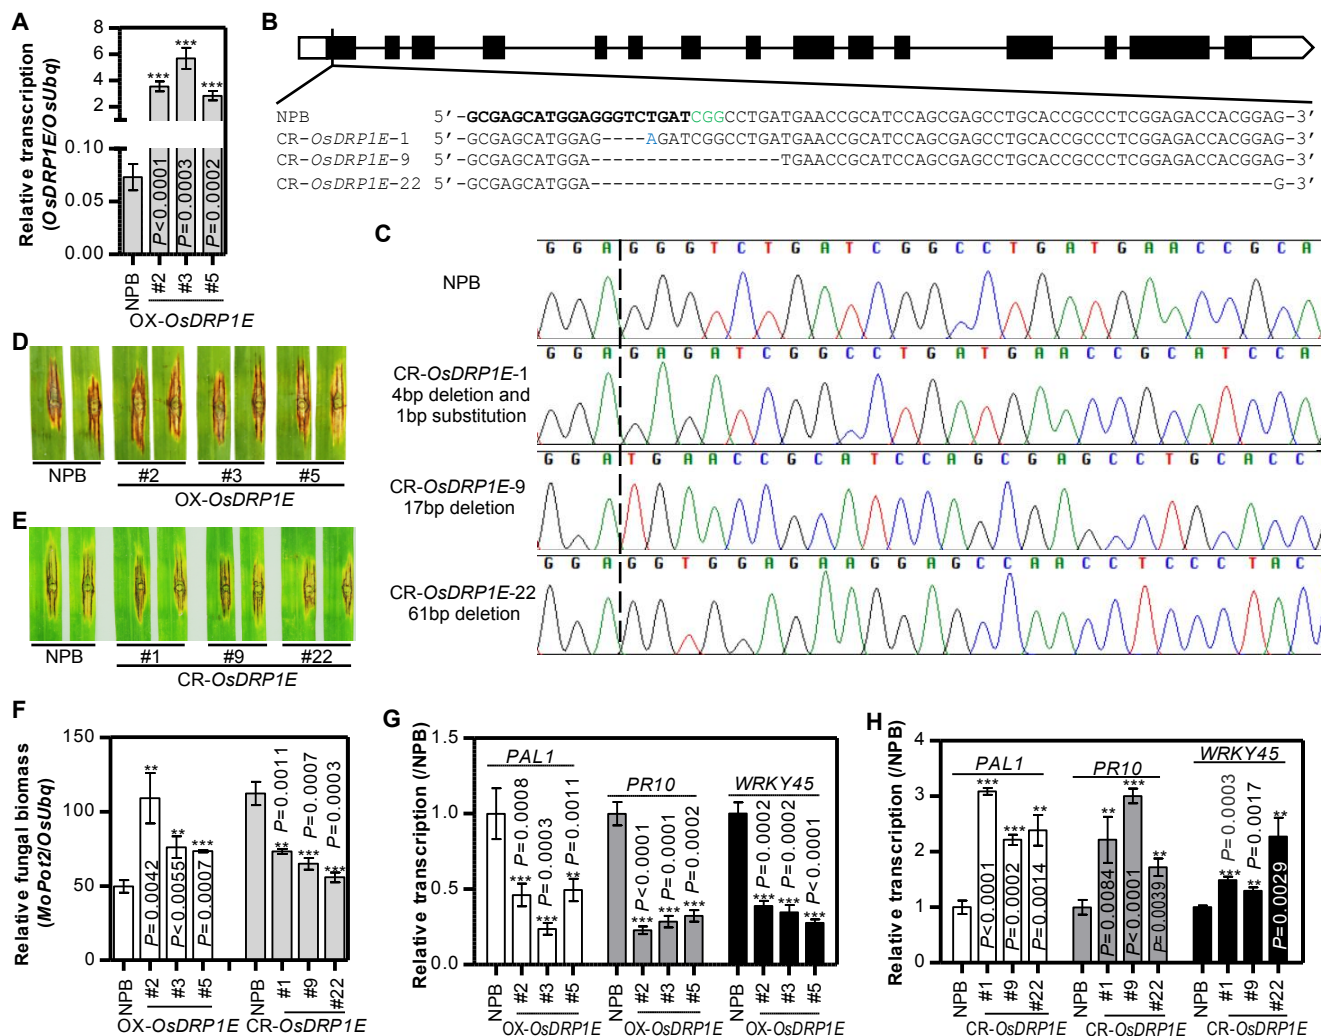

**Fig. S6. *OsDRP1E* negatively regulates rice immunity.** (A) *OsDRP1E* transcript levels in *OsDRP1E* overexpression plants. (B) Schematic representation of the *OsDRP1E* structure and gene editing site. Bold letters indicate the target sequences of single guide RNA, green letters indicate PAM, - indicates nucleotide deletion, blue letter indicates nucleotide substitution. (C) Sanger sequencing chromatograph of the target site in *OsDRP1E*. Punch inoculation of *OsDRP1E* (D) overexpression and (E) CRISPR/Cas9-edited plants with *M. oryzae*. (F) Relative fungal biomass of punch-inoculated leaves in (D, E). Transcript levels of PR genes in *OsDRP1E* (G) overexpression and (H) CRISPR/Cas9-edited plants at 2 days after inoculation. Bars (A, F-H) represent means  $\pm$  SD, n = 3. Asterisks (A, F-H) indicate the significant differences between the transgenic line and NPB according to Student's *t*-test.

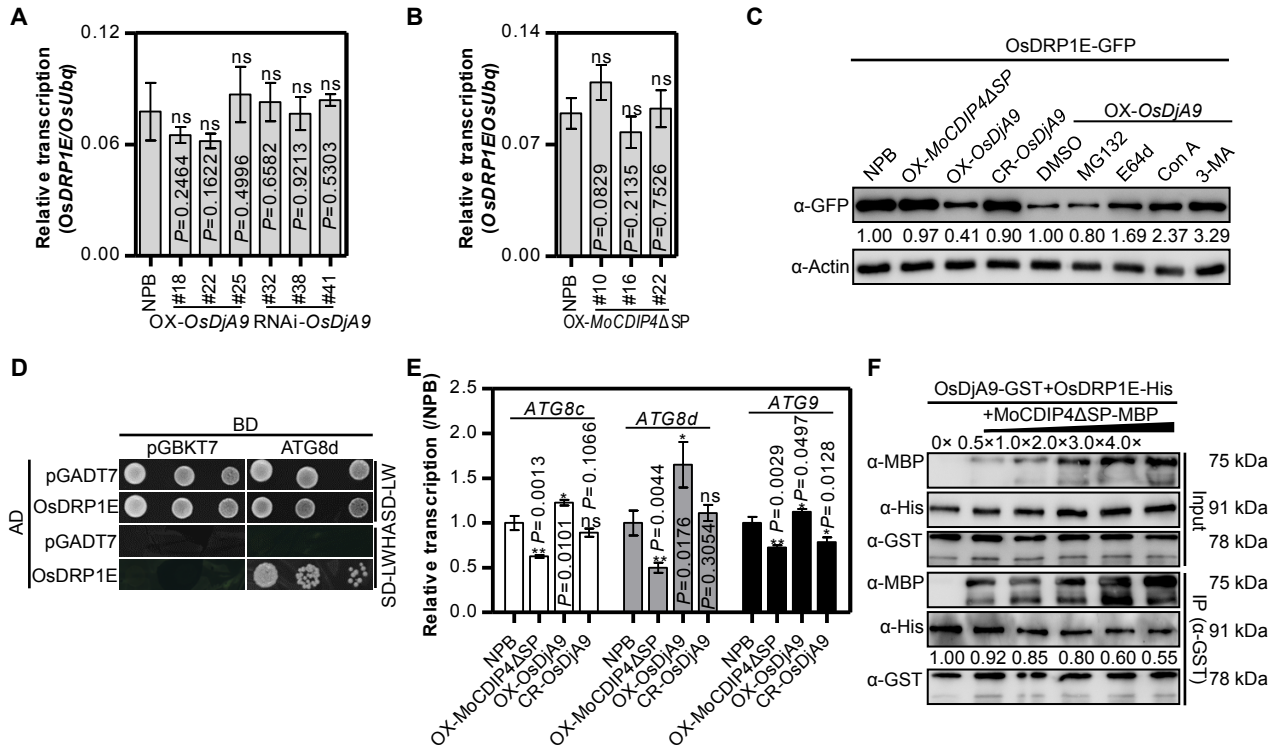

**Fig. S7. MoCDIP4 stabilizes OsDRP1E by decreasing the association of OsDjA9 with OsDRP1E in a competitive manner.** *OsDRP1E* transcript levels in (A) *OsDjA9* transgenic plants and (B) *MoCDIP4* transgenic plants. Bars represent means  $\pm$  SD, n = 3. ns indicates no significant difference between the transgenic line and NPB according to Student's *t*-test. (C) OsDRP1E protein levels when expressed in NPB and transgenic rice protoplasts. Inhibitors were added at 12 h after transfection, respectively. Protoplasts were sampled at 12 h after the treatment. (D) Interaction between OsDRP1E and ATG8d in yeast. (E) Transcript levels of autophagy components in transgenic rice protoplasts when transformed with OsDRP1E-GFP plasmids. Bars represent means  $\pm$  SD, n = 3. Asterisks indicate significant differences between the transgenic line and NPB according to a Student's *t*-test. (F) The dosage dependent effect of MoCDIP4 on the OsDjA9-OsDRP1E interaction in GST pull-down assay. Relative band intensity of each lane below the panel is determined by ImageJ.

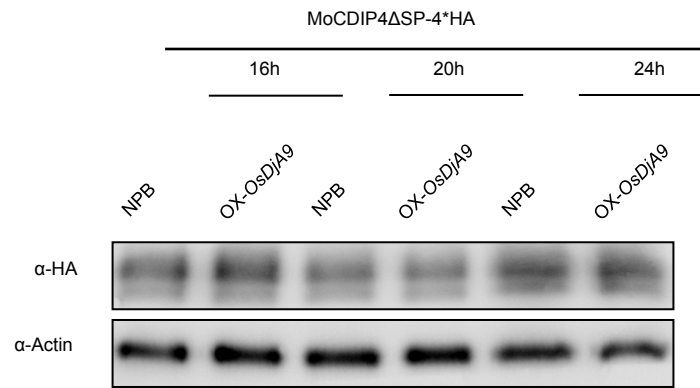

**Fig. S8. *OsDjA9* does not affect the protein levels of MoCDIP4.** MoCDIP4 was expressed in NPB and *OsDjA9* overexpression rice protoplasts. Protoplasts were sampled at 16 h, 20 h, and 24 h after the transfection. The actin protein was used as the internal control.

**Table S1. Primers are used in this study.**

| Primers name                           | Sequence (5'-3')                               | Purpose               |
|----------------------------------------|------------------------------------------------|-----------------------|
| <i>PALI</i> -QF                        | AGCACATCTTGGAGGGAAGCT                          | qRT-PCR               |
| <i>PALI</i> -QR                        | GCGCGGATAACCTCAATTTG                           |                       |
| <i>OsUbg</i> -QF                       | CGCAAGAAGAAGTGTGGTCA                           | qRT-PCR               |
| <i>OsUbg</i> -QR                       | GGGAGATAACAACGGAAGCA                           |                       |
| <i>WRKY45</i> -QF                      | ACGACATTATGGGTTTGGAGCTT                        | qRT-PCR               |
| <i>WRKY45</i> -QR                      | GAGACGACACATCAACAAGGAA                         |                       |
| <i>PBZ1</i> -QF                        | CCCTGCCGAATACGCCTAA                            | qRT-PCR               |
| <i>PBZ1</i> -QR                        | CTCAAACGCCACGAGAATTTG                          |                       |
| <i>PR10</i> -QF                        | ATGAAGGAGAGGCTGGAGTTC                          | qRT-PCR               |
| <i>PR10</i> -QR                        | CCTTAGCCTTGGTGATCTCGT                          |                       |
| <i>OsUbg</i> -GQF                      | TTCTGGTCCTTCCACTTTCAG                          | Fungal biomass        |
| <i>OsUbg</i> -GQR                      | ACGATTGATTTAACCAGTCCATGA                       |                       |
| <i>MoPOT2</i> -GQF                     | ACGACCCGTCTTTACTTATTTGG                        | Fungal biomass        |
| <i>MoPOT2</i> -GQR                     | AAGTAGCGTTGGTTTTGTTGGAT                        |                       |
| <i>OsDjA9</i> -QF                      | ATCCGACTCAACATAGTGCCTG                         | qRT-PCR               |
| <i>OsDjA9</i> -QR                      | TTGCCTGAGTCACGTTCAATAC                         |                       |
| <i>OsDRP1E</i> -QF                     | CTATCCGTGCAAAATGTGAAGA                         | qRT-PCR               |
| <i>OsDRP1E</i> -QR                     | TTCCTCACCAAGTCCCTTAAAA                         |                       |
| <i>MoCDIP4</i> -RT-F                   | TACATCTTCAGCATCGTCTTCG                         | RT-PCR                |
| <i>MoCDIP4</i> -RT-R                   | CTCGATGAACTCGTTGTACCAG                         |                       |
| pRHV- <i>MoCDIP4</i> ΔSP-F             | CGGGATCCATGCACTACATCTTCAGCATCG                 | pRHV,                 |
| pRHV- <i>MoCDIP4</i> -R                | CGAGCTCCAAGCACTGGCTGTAGTACTG                   | pRTVcHA               |
| pRHV- <i>OsDjA9</i> -F                 | CGAGCTCATGCGGCTCCCCGGCGACGCT                   | pRHV,                 |
| pRHV- <i>OsDjA9</i> -R                 | GGGGTACCTCCCGATGCTCCTGCTGCCTTT                 | pRTVcHA,<br>pRTVcMyc  |
| pANDA- <i>OsDjA9</i> -F                | CGGGATCCGCGGCGGTGGAATGAATG                     | pANDA                 |
| pANDA- <i>OsDjA9</i> -R                | CCGCTCGAGCCTTCACAGTCTTCCCAC                    |                       |
| U6a- <i>OsDjA9</i> -F                  | GCCGGTCCATCCGGATACAAATAA                       | pYLCRISPR/Cas         |
| U6a- <i>OsDjA9</i> -R                  | AAACTTATTTGTATCCGGATGGAC                       | 9P <sub>ubi</sub> -H  |
| U6a- <i>OsDRP1E</i> -F                 | GCCGCGAGCATGGAGGGTCTGAT                        | pYLCRISPR/Cas         |
| U6a- <i>OsDRP1E</i> -R                 | AAACATCAGACCCTCCATGCTCG                        | 9P <sub>ubi</sub> -H  |
| pRHV- <i>OsDRP1E</i> -F                | CGGGATCCATGGCGAGCATGGAGGGTCT                   | pRHV,                 |
| pRHV- <i>OsDRP1E</i> -R                | GGGGTACCCCTGGTCCATGCGACAGAGT                   | pSPYNE(R)173          |
| pMAL-c2- <i>MoCDIP4</i> -F             | AGAATTCATGAAGTCGACAACCTTCCT                    | pMAL-c2               |
| pMAL-c2- <i>MoCDIP4</i> -R             | GCTCTAGACTACAAGCACTGGCTGTAGTA                  |                       |
| pMAL-c2- <i>MoCDIP4</i> ΔSP-F          | AGAATTCATGCACTACATCTTCAGCATCG                  | pMAL-c2               |
| pGEX-6p-1- <i>OsDjA9</i> -F            | TCCCCCGGGTATGCGGCTCCCCGGCGACGCT                | pGEX-6p-1             |
| pGEX-6p-1- <i>OsDjA9</i> -R            | CCCTCGAGCTATCCCGATGCTCCTGCTGC                  |                       |
| pGADT7- <i>OsDjA9</i> -R               | CCCTCGAGCCTATCCCGATGCTCCTGCTGC                 | pGADT7                |
| pGADT7- <i>OsDjA11</i> -F              | GGAGGCCAGTGAATTCATGGCGCGCGCCGCCCTC             | pGADT7                |
| pGADT7- <i>OsDjA11</i> -R              | TCGAGCTCGATGGATCCCTCATCCGGAGGCAGCTGCAAC        |                       |
| pCAMBIA1300-cLUC- <i>OsDjA11</i> -F    | TACGCGTCCCGGGGCGGTACCATGGCGCGCGCCGCCCTC        | pCAMBIA1300-<br>cLUC  |
| pCAMBIA1300-cLUC- <i>OsDjA11</i> -R    | ACGAAAGCTCTGCAGGTGCACTCATCCGGAGGCAGCTGCAA<br>C |                       |
| pCAMBIA1300-cLUC- <i>OsDjA9</i> -F     | GGGGTACCATGCGGCTCCCCGGCG                       | pCAMBIA1300-<br>cLUC  |
| pCAMBIA1300-cLUC- <i>OsDjA9</i> -R     | GCGTCGACCTATCCCGATGCTCCTGC                     |                       |
| pCAMBIA1300-nLUC- <i>MoCDIP4</i> ΔSP-F | CGGGATCCAATGCACTACATCTTCAGCATCG                | pCAMBIA1300-<br>nLUC, |
| pCAMBIA1300-nLUC-                      | GCGTCGACCAAGCACTGGCTGTAGTAC                    | pCAMBIA1300-          |

|                                     |                                                                  |                                             |
|-------------------------------------|------------------------------------------------------------------|---------------------------------------------|
| <i>MoCDIP4</i> ΔSP-R                |                                                                  | cLUC                                        |
| pGBKT7- <i>MoCDIP4</i> ΔSP-F        | CATGGAGGCCGAATTCATGCACTACATCTTCAGCATCG                           | pGBKT7                                      |
| pGBKT7- <i>MoCDIP4</i> ΔSP-R        | TGCAGGTCGACGGATCCCCTACAAGCACTGGCTGTAGTAC                         |                                             |
| <i>MoCDIP4</i> -pro-F               | CATAGTCTATATAAGGCACGCTCATTACCATG                                 | <i>MoCDIP4</i>                              |
| <i>MoCDIP4</i> -pro-R               | TTGACCTCCACTAGCTCCAGCCAAGCCACTTCATGATGGGCG<br>GGGGGA             | knockout strain                             |
| <i>MoCDIP4</i> -3UTR-F              | GAATAGAGTAGATGCCGACCCGCGGGTTGGCTGGGAAGATTG<br>AGGATGTGTG         |                                             |
| <i>MoCDIP4</i> -3UTR-R              | AGAGCTTTGGGGCAGTAAGATA                                           |                                             |
| pKNGT- <i>MoCDIP4</i> -pro-F        | GGGAACAAAAGCTGGGTACCTCAAACAGATCAAGAGGGATC<br>A                   | <i>MoCDIP4</i><br>complementation<br>strain |
| pKNGT- <i>MoCDIP4</i> -CDS-R        | CTGCAGGCATGCAAGCTTCAAGCACTGGCTGTAGTACTGG                         |                                             |
| pSPYCE(M)- <i>OsDjA9</i> -F         | GCTCTAGAATGCGGCTCCCCGGCGACGCT                                    | pSPYCE(M)                                   |
| pCAMBIA1300-nLUC- <i>OsDRP1E</i> -F | ACGGGGGACGAGCTCGGTACCATGGCGAGCATGGAGGGTCT<br>G                   | pCAMBIA1300-<br>nLUC                        |
| pCAMBIA1300-nLUC- <i>OsDRP1E</i> -R | CGCGTACGAGATCTGGTTCGACCCTGGTCCATGCGACAGAGT<br>C                  |                                             |
| pGADT7- <i>OsDRP1E</i> -F           | GGAATTCATATGATGGCGAGCATGGAGGGTCT                                 | pGADT7,                                     |
| pGADT7- <i>OsDRP1E</i> -R           | CGGGATCCCCTACCTGGTCCATGCGACAGA                                   | pGBKT7                                      |
| pSUC2-SP-F                          | AATTCATGAAGTCGACAACCTTCCTCAGCCTGCTGGCGGCTC<br>CGCTGGCCGCGCAGGCCG | pSUC2                                       |
| pSUC2-SP-R                          | TCGAGCGCCTGCGCGGCCAGCGGAGCCGCCAGCAGGCTGA<br>GGAAGTTGTCTGACTTCATG |                                             |
